# Supplementary material for: Loading capacity of dynamic knee spacers: a comparison between hand-moulded and COPAL spacers
Source: Springer Nature journal article supplement (doi:10.1186/s12891-019-2982-5), 2019-12-01
Supplement: MOESM1 [file 17641564]

Supplementary material

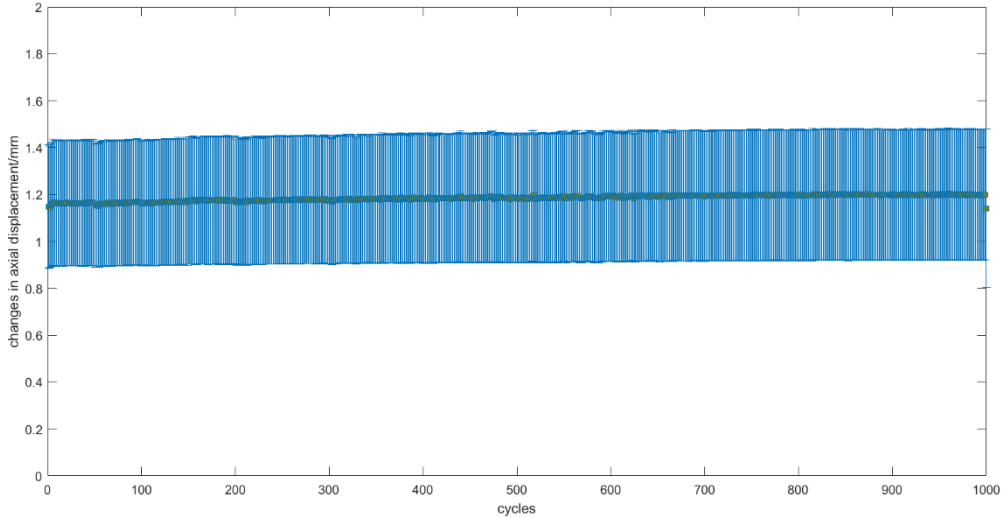

Figure S1: Mean and standard deviation of changes in axial displacement ( $d$ ) during cyclic loading [30 1200 N] of all specimens implanted with COPAL knee spacers.

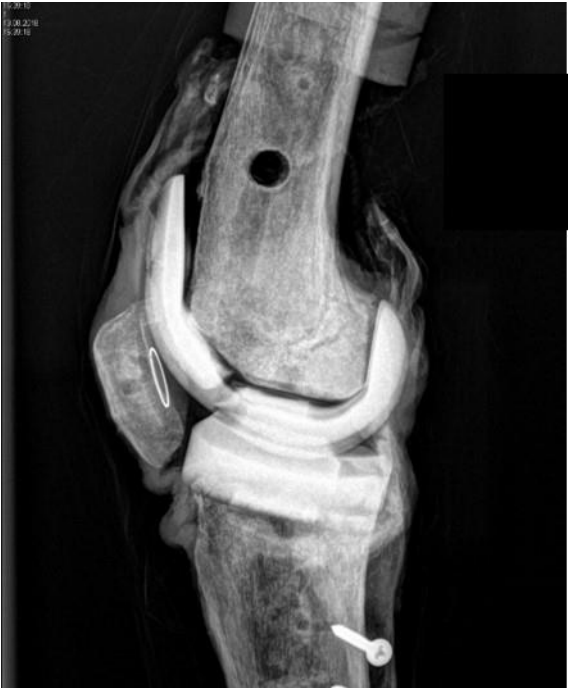

Figure S2: Broken femoral component of COPAL knee spacer of one specimen during cyclic loading to 2600 N
